# Supplementary material
Source: PubMed Central journal article supplement (PMC1763611)
Supplement: oenvmed_59_12_855__1.pdf [file oenvmed_59_12_855__1.pdf]

## Reference List

1. International Programme on Chemical Safety. Hazardous chemicals in human and environmental health-A resource book for school, college and university students. Geneva: World Health Organisation, 2000.
2. Baxter P. Review of major chemical incidents and their medical management. In Murray V, ed. *Major chemical disasters-medical aspects of management*, pp 7-20. London: Royal Society of Medicine Services, 1990.
3. Wagner GN, Clark MA, Koenigsberg EJ, Decata SJ. Medical evaluation of the victims of the 1986 Lake Nyos disaster. *Journal of Forensic Sciences* 1988;**33**:899-909.
4. Hall I, Haugh G, Price-Green P, Dhara V, Kaye W. Risk factors for hazardous substance release that result in injuries and evacuations:data from 9 states. *American Journal of Public Health* 1996;**86**:855-7.
5. Andersson B. Lithuanian ammonia incident. *ICHEME Symposium Series No.124* 1990.
6. Jones R, Hughes J, Glindmeyer H, Weill H. Lung function after acute chlorine exposure. *American Review of Respiratory Disease* 1986;**134**:1190-5.
7. Morabia A, Sellegger C, Landry JC, Conne P, Urban P, Fabre J. Accidental bromine exposure in an urban population: an acute epidemiological assessment. *International Journal of Epidemiology* 1988;**17**:148-52.
8. Morabia A, Sellegger C, Conne P, Landry JC, Fabre J. [Bromine cloud in Geneva. Epidemiologic study of the short-term effects on a population sample]. *Schweizerische Medizinische Wochenschrift* 1986;*Journal Suisse de Medecine*. **116**:11-8.
9. Smith RP, Gosselin RE. Hydrogen sulfide poisoning. *Journal of Occupational Medicine* 1979;**21**:93-7.

10. Snyder JW, Safir EF, Summerville GP, Middleberg RA. Occupational fatality and persistent neurological sequelae after mass exposure to hydrogen sulfide. *American Journal of Emergency Medicine* 1995;**13**:199-203.
11. Watt MM, Watt SJ, Seaton A. Episode of toxic gas exposure in sewer workers. *Occupational & Environmental Medicine* 1997;**54**:277-80.
12. Wang L, Ding X, Zhang H. [Analysis of 25 episodes of acute occupational poisoning accidents and studies on its preventive strategy]. *Chung-Hua Yu Fang i Hsueh Tsa Chih [Chinese Journal of Preventive Medicine]* 1998;**32**:235-7.
13. Kimura K, Hasegawa M, Matsubara K, Maseda C, Kagawa M, Takahashi S *et al.* A fatal disaster case based on exposure to hydrogen sulfide--an estimation of the hydrogen sulfide concentration at the scene. *Forensic Science International* 1994;**66**:111-6.
14. An eyewitness in Bhopal. *Br Med J* 1985;**290**:1883-4.
15. Salmon A. Bright red blood of Bhopal victims:cyanide or MIC? *Br J Ind Med* 1986;**43**:502-4.
16. Anonymous. Calamity at Bhopal. *Lancet* 1984;**ii**:1378-9.
17. Andersson N, Ajwani M, Mahashabde S, Tiwari M, Kerr, Muir M *et al.* Delayed eye and other consequences from exposure to methyl isocyanate: 93% follow up of exposed and unexposed cohorts in Bhopal. *Br J Ind Med* 1990;**47**:553-8.
18. Nemery B, Sparrow S, Dinsdale D. Methyl isocyanate: thiosulphate dose not protect. *Lancet* 1985;**ii**:1245-6.
19. Bertazzi PA, Zocchetti C, Pesatori AC, Guercilena S, Sanarico M, Radice L. Ten-year mortality study of the population involved in the Seveso incident in 1976. *American Journal of Epidemiology* 1989;**129**:1187-200.
20. Mastroiacovo P, Spagnolo A, Marni E, Meazza L, Bertollini R, Segni G *et al.* Birth defects in the Seveso area after TCDD contamination. *JAMA* 1988;**259**:1668-72.
21. Anonymous. Camelford two years on. *Lancet* 1990;**336**:366.

22. Anonymous. After Camelford. *Lancet* 1989;**ii**:288.
23. Clayton, B and Advisory Group, Water Pollution at Lowermoor North Cornwall. Report of the Lowermoor incident advisory group-Chairman: Professor Dame Barabara Clayton. 1989. Cornwall and Scilly District Health Authority, Truro.
24. Baker EL, Landrigan PJ, Bertozzi PE, Field PH, Basteys, BJ *et al.* Phenol poisoning due to contaminated drinking water. *Archives of Environmental Health* 1978;**33**:89-94.
25. Jarvis SN, Straube RC, Williams AL, Bartlett CL. Illness associated with contamination of drinking water supplies with phenol. *British Medical Journal Clinical Research Ed* 1985;., **290**:1800-2.
26. Kim, DH, Lee, SK, Chun, BY, Lee, DH, Hong, SC, and Jang, BK. Illness associated with contamination of drinking water supplies with phenol. *Journal of Korean Medical Science* 9, 218-223. 1994.
27. Kuratsune M, Yoshimura T, Matsuzaka J, Yamaguchi A. Yusho, a poisoning caused by rice oil contaminated with polychlorinated biphenyls. *HSMHA Health Reports* 1971;**86**:1083-91.
28. Morgan JP. The Jamaica ginger paralysis. *JAMA* 1982;**248**:1864-7.
29. Ferrer A, Cabral R. Recent epidemics of poisoning by pesticides. *Toxicology Letters* 1995;**82-83**:55-63.
30. Diggory HJ, Landrigan PJ, Latimer KP, Ellington AC, Kimbrough RD, Liddle JA *et al.* Fatal parathion poisoning caused by contamination of flour in international commerce. *American Journal of Epidemiology* 1977;**106**:145-53.
31. Etzel RA, Forthal DN, Hill RH, Jr., Demby A. Fatal parathion poisoning in Sierra Leone. *Bulletin of the World Health Organization* 1987;**65**:645-9.

32. Weeks DE. Endrin food-poisoning. A report on four outbreaks caused by two separate shipments of endrin-contaminated flour. *Bulletin of the World Health Organization* 1967;**37**:499-512.
33. Cam C, Nigogosyan G. Acquired toxic porphyria cutanea tarda due to hexachlorobenzene. Report of 348 cases caused by this fungicide. *JAMA* 1963;**183**:88-91.
34. Schmid R. Cutaneous porphyria in Turkey. *JAMA* 1960;**263**:397-8.
35. Deng J, Jan I, Cheng H. The essential role of a poison centre in handling an outbreak of barium carbonate poisoning. *Vet.Hum.Toxicol* . 1991;**33**:173-5.
36. Goldman LR, Smith DF, Neutra RR, Saunders LD, Pond EM, Stratton J *et al*. Pesticide food poisoning from contaminated watermelons in California, 1985. *Archives of Environmental Health* 1990;**45**:229-36.
37. Goldman LR, Beller M, Jackson RJ. Aldicarb food poisonings in California, 1985-1988: toxicity estimates for humans. *Archives of Environmental Health* 1990;**45**:141-7.
38. Anonymous. Report of specialists appointed by the Secretary General to investigate allegations by the Islamic Republic of Iran concerning the use of chemical weapons. S/16433. 1986.
39. Jorgensen B, Olesen B, Berntsen O. Sennepsgasulykker Bornholm. *Ugeskr.Laeg*. 1985;**147**:2251-4.
40. Morita, H, Yanagisawa, N, Nakajima, T, Shimizu, M, Hidemitsu, H, and Okudera, H. Sarin poisoning in Matsumoto, Japan. *Lancet* 346, 290-293. 1995.
41. Woodall, J. Tokyo subway gas attack. *Lancet* 350, 296. 1997.

42. Smith, AH, Lingas, EO, and Rahman, M. Contamination of drinking-water by arsenic in Bangladesh: a public health emergency. *Bull WHO* 78(9), 1093-1103. 2000.
43. Tsuchiya, K. Epidemiological studies on cadmium in the environment in Japan: etiology of itai-itai disease. *Fed.Proc* 35, 2412-2418. 1976.
44. Powell PP. Minamata disease: a story of mercury's malevolence. *Southern Medical Journal* 1991;**84**:1352-8.
45. Tsubaki T, Irukayama K. Minamata disease. Amsterdam: Elsevier Scientific Publishing Co, 1977.
46. Clarkson TW. Mercury: major issues in environmental health. *Environmental Health Perspectives* 1993;**100**:31-8.
47. Akagi H, Malm O, Branches FJP, Kinjo Y, Kashima Y, Guimaraes JRD *et al.* Human exposure to mercury due to goldmining in the Tapajos River basin, Amazon, Brazil: Speciation of mercury in human hair, blood and urine. *Water, Air, & Soil Pollution* 1995;**80**:85-94.
48. Branches FJP, Erickson TB, Aks SE, Hryhorczuk DO. The price of gold: Mercury exposure in the amazonian rain forest. *Journal of Toxicology - Clinical Toxicology* 1993;**31**:295-306.
49. Epstein PR. Mercury poisoning. *Lancet* 1991;**337**:1344.
50. The Council of the European Union. Council Directive 96/82/EEC (Seveso II Directive). 1996.
51. Brennan RJ, Waeckerle JF, Sharp TW, Lillibridge SR. Chemical warfare agents: emergency medical and emergency public health issues. *Annals of Emergency Medicine* 1999;**34**:191-204.
52. Toxnet. National Library of Medicine. <http://toxnet.nlm.nih.gov/>
53. Canada's National Centre for Occupational Health and Safety Information. <http://www.ccohs.ca/>

54. ATSDR-Managing Hazardous Materials Incidents. <http://www.atsdr.cdc.gov/mhmi.html>.
